# Supplementary material for: Cognitive Impairment in Mental Illness: An SSA Blind Spot?
Source: Atypon-hosted journal article supplement (doi:10.1176/ps.62.6.pss6206_0682), 2011-06-01
Supplement: Amdur_ds.pdf [file Amdur_ds.pdf]

**Table 1****Mean scores on the Montreal Cognitive Assessment (MoCA) of 197 outpatients seen in consecutive psychiatric evaluations<sup>a</sup>**

| <b>Diagnosis</b>                                         | <b>Total<br/>N</b> | <b>MoCA score</b> |            |
|----------------------------------------------------------|--------------------|-------------------|------------|
|                                                          |                    | <b>M</b>          | <b>SD</b>  |
| <b>Schizophrenia/Schizoaffective/Delusional Disorder</b> | <b>54</b>          | <b>20.6</b>       | <b>4.6</b> |
| <b>Major Depression</b>                                  | <b>51</b>          | <b>21.1</b>       | <b>3.9</b> |
| <b>Bipolar Disorder/Mood Disorder NOS</b>                | <b>36</b>          | <b>22.4</b>       | <b>4.6</b> |
| <b>Anxiety Disorder/PTSD/Panic/OCD</b>                   | <b>36</b>          | <b>20.6</b>       | <b>4.2</b> |
| <b>Major Depression With Psychotic Features</b>          | <b>20</b>          | <b>17.3</b>       | <b>4.0</b> |

<sup>a</sup> Among the 224 persons there were 27 with a variety of less frequent diagnoses, and their scores are not reported here.
